# Supplementary material for: Host genotype controls ecological change in the leaf fungal microbiome
Source: PLOS journal article supplement (doi:10.1371/journal.pbio.3001681), 2022-08-11
Supplement: S1 (10.1371/journal.pbio.3001681.s001) [file journal.pbio.3001681.s001]

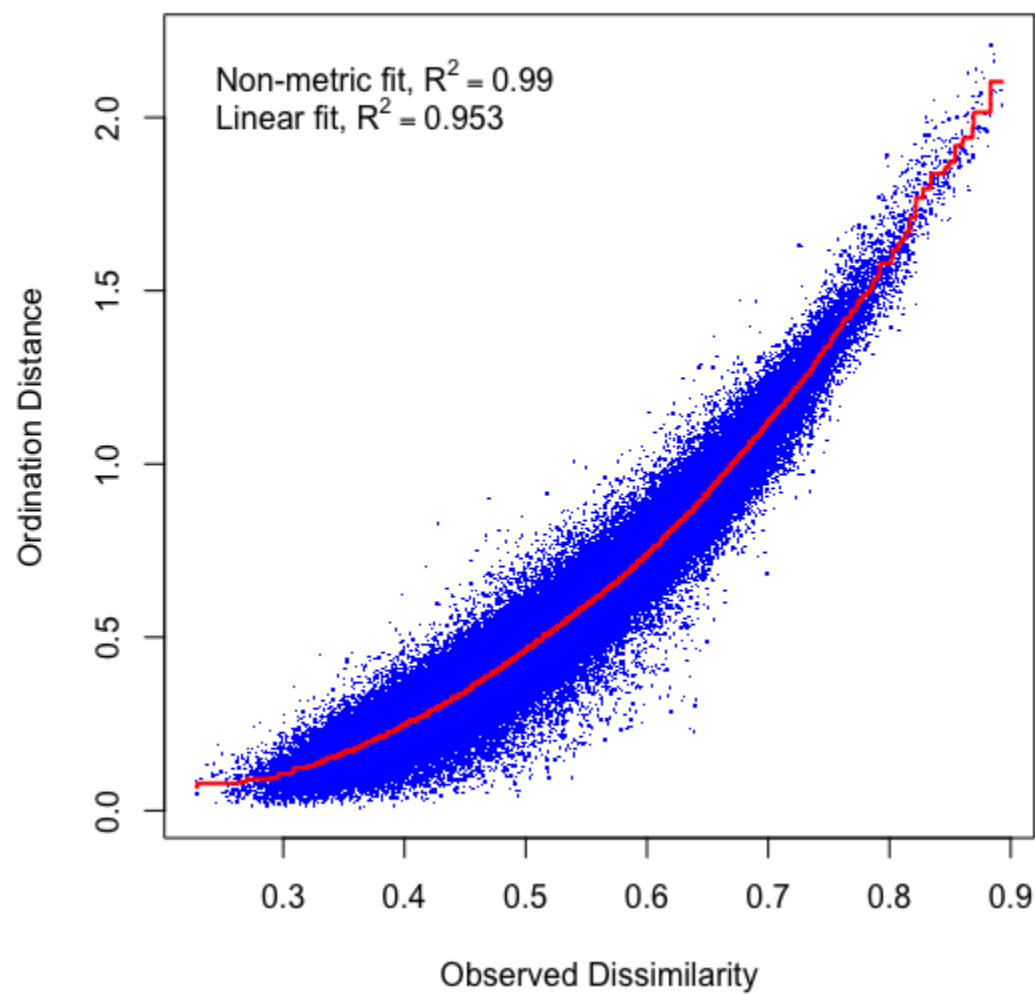

**Figure S1:** Shepard stress plot for NMDS of Kellogg Biological Station site. Data underlying this figure can be found in FigS1 Data.
